# Supplementary material for: The electronic structure of the catalytic intermediate Ni-C in [NiFe] and [NiFeSe] hydrogenasesElectronic Supplementary Information available. See http://www.rsc.org/suppdata/cp/b1/b105723p/
Source: Royal Society of Chemistry journal article supplement (doi:10.1039/b105723p), 2001-11-21
Supplement: tables.pdf [file tables.pdf]

Table 1: Optimized Cartesian Coordinates for the Ni-C Form of the [NiFe] Hydrogenase in Å and g-Tensor Eigenvectors.

| Atom                     | x        | y        | z        |
|--------------------------|----------|----------|----------|
| C                        | 31.4473  | 40.7146  | 114.4278 |
| C                        | 30.6778  | 42.0427  | 114.4450 |
| S                        | 31.0220  | 43.0629  | 112.8500 |
| H                        | 31.2052  | 40.1193  | 115.3299 |
| H                        | 31.1758  | 40.1284  | 113.5333 |
| H                        | 32.5347  | 40.8979  | 114.4040 |
| H                        | 30.9603  | 42.6573  | 115.3114 |
| H                        | 29.5956  | 41.8644  | 114.4848 |
| C                        | 33.4079  | 46.2343  | 114.5440 |
| C                        | 32.0377  | 46.9170  | 114.5961 |
| S                        | 30.6756  | 45.6612  | 115.1299 |
| H                        | 34.1853  | 46.9724  | 114.2671 |
| H                        | 33.6681  | 45.8009  | 115.5251 |
| H                        | 33.3995  | 45.4212  | 113.7998 |
| H                        | 31.7403  | 47.3332  | 113.6265 |
| H                        | 31.9986  | 47.7240  | 115.3408 |
| C                        | 26.7143  | 45.5342  | 109.4580 |
| C                        | 27.5770  | 45.9774  | 110.6493 |
| S                        | 28.8181  | 44.5653  | 111.0975 |
| H                        | 25.9784  | 46.3197  | 109.2014 |
| H                        | 27.3422  | 45.3290  | 108.5731 |
| H                        | 26.1684  | 44.6083  | 109.7090 |
| H                        | 26.9547  | 46.1933  | 111.5266 |
| H                        | 28.1514  | 46.8833  | 110.4085 |
| C                        | 25.7998  | 42.6727  | 114.1090 |
| C                        | 26.2298  | 44.1425  | 114.0444 |
| S                        | 27.9341  | 44.3659  | 114.9061 |
| H                        | 24.7975  | 42.5506  | 113.6555 |
| H                        | 26.5152  | 42.0434  | 113.5558 |
| H                        | 25.7592  | 42.3211  | 115.1544 |
| H                        | 25.5281  | 44.8096  | 114.5616 |
| H                        | 26.3425  | 44.4800  | 113.0084 |
| FE                       | 28.5705  | 46.6515  | 114.8035 |
| NI                       | 29.6397  | 44.8966  | 113.1820 |
| C                        | 26.9000  | 47.2080  | 114.1015 |
| N                        | 25.8394  | 47.5369  | 113.6654 |
| C                        | 29.3067  | 48.3722  | 114.4740 |
| N                        | 29.7808  | 49.4572  | 114.3277 |
| C                        | 28.1354  | 47.0784  | 116.4186 |
| O                        | 27.8261  | 47.3544  | 117.5511 |
| H                        | 28.9277  | 46.3353  | 113.1460 |
| g-tensor<br>eigenvectors | $g_x$    | $g_y$    | $g_z$    |
|                          | -0.34741 | -0.63260 | -0.69218 |
|                          | +0.93771 | -0.23640 | -0.25459 |
|                          | -0.00258 | -0.73751 | +0.67533 |

Table 2: Optimized Cartesian Coordinates for the Ni-C Form of the [NiFeSe] Hydrogenase in Å and g-Tensor Eigenvectors.

| Atom                     | x         | y         | z          |
|--------------------------|-----------|-----------|------------|
| C                        | 31.672984 | 40.744162 | 114.401625 |
| C                        | 30.891326 | 42.061632 | 114.503268 |
| S                        | 30.994634 | 43.034454 | 112.845633 |
| Fe                       | 28.532744 | 46.630498 | 114.779894 |
| C                        | 28.142130 | 47.115917 | 116.388678 |
| O                        | 27.866952 | 47.440001 | 117.517671 |
| S                        | 30.648677 | 45.657951 | 115.129247 |
| C                        | 31.998003 | 46.847178 | 114.431783 |
| C                        | 33.363189 | 46.152292 | 114.422639 |
| S                        | 27.878803 | 44.339849 | 114.925826 |
| C                        | 26.214099 | 44.140392 | 113.978859 |
| C                        | 25.757388 | 42.678378 | 114.001653 |
| C                        | 26.846857 | 47.183694 | 114.113072 |
| N                        | 25.776243 | 47.509313 | 113.701342 |
| C                        | 29.263169 | 48.325946 | 114.330294 |
| N                        | 29.735001 | 49.390491 | 114.072111 |
| Se                       | 28.777299 | 44.537673 | 111.017493 |
| C                        | 27.637226 | 46.165506 | 110.573413 |
| C                        | 26.742524 | 45.876724 | 109.357892 |
| H                        | 31.584567 | 40.165788 | 115.341172 |
| H                        | 31.282064 | 40.133126 | 113.570912 |
| H                        | 32.740047 | 40.943189 | 114.207280 |
| H                        | 31.287988 | 42.704245 | 115.301062 |
| H                        | 29.828159 | 41.874203 | 114.701570 |
| H                        | 34.132352 | 46.837543 | 114.017442 |
| H                        | 33.659482 | 45.855264 | 115.443257 |
| H                        | 33.320977 | 45.247410 | 113.794226 |
| H                        | 31.676869 | 47.141841 | 113.425573 |
| H                        | 31.979042 | 47.738481 | 115.073244 |
| H                        | 26.115916 | 46.759254 | 109.127737 |
| H                        | 27.347124 | 45.630524 | 108.466592 |
| H                        | 26.076423 | 45.022281 | 109.566170 |
| H                        | 27.032032 | 46.412343 | 111.455291 |
| H                        | 28.313104 | 47.009745 | 110.375716 |
| H                        | 24.789902 | 42.580233 | 113.472978 |
| H                        | 26.499625 | 42.039793 | 113.496030 |
| H                        | 25.631382 | 42.320372 | 115.037817 |
| H                        | 25.495223 | 44.814009 | 114.462526 |
| H                        | 26.390386 | 44.484788 | 112.953979 |
| H                        | 28.861939 | 46.253598 | 113.131338 |
| Ni                       | 29.594338 | 44.829504 | 113.219678 |
| g-tensor<br>eigenvectors | $g_x$     | $g_y$     | $g_z$      |
|                          | -0.38535  | +0.63102  | +0.67329   |
|                          | +0.92246  | +0.28246  | +0.26323   |
|                          | -0.02408  | +0.72251  | -0.69094   |
